# Supplementary material for: A Single-Session, Web-Based Parenting Intervention to Prevent Adolescent Depression and Anxiety Disorders: Randomized Controlled Trial
Source: PubMed Central journal article supplement (PMC5945988; doi:10.2196/jmir.9499), 2018-04-26
Supplement: jmir_v20i4e148_app2.pdf [file jmir_v20i4e148_app2.pdf]

## Multimedia Appendix 2. Parental responses to process evaluation questions

**Table 1.** Frequencies of parental responses to process evaluation questions administered after receiving the intervention

| Question                                                                                              | N   | %    |
|-------------------------------------------------------------------------------------------------------|-----|------|
| <b>How much of your feedback have you read at this stage? (n=265)</b>                                 |     |      |
| All of it                                                                                             | 206 | 77.7 |
| About half of it                                                                                      | 51  | 19.2 |
| I will only read it later                                                                             | 8   | 3.0  |
| I'm not interested in it                                                                              | 0   | 0.0  |
| <b>How satisfied are you with the feedback you received about your parenting? (n=264)</b>             |     |      |
| Very satisfied                                                                                        | 129 | 48.9 |
| Somewhat satisfied                                                                                    | 118 | 44.7 |
| Somewhat dissatisfied                                                                                 | 14  | 5.3  |
| Very dissatisfied                                                                                     | 3   | 1.1  |
| <b>How useful did you find the feedback you received about your parenting? (n=264)</b>                |     |      |
| Extremely useful                                                                                      | 45  | 17.0 |
| Very useful                                                                                           | 111 | 42.0 |
| Somewhat useful                                                                                       | 95  | 36.0 |
| Not useful                                                                                            | 13  | 4.9  |
| <b>How likely are you to change your parenting based on this feedback? (n=264)</b>                    |     |      |
| Very likely                                                                                           | 92  | 34.8 |
| Somewhat likely                                                                                       | 146 | 55.3 |
| Somewhat unlikely                                                                                     | 19  | 7.2  |
| Very unlikely                                                                                         | 7   | 2.7  |
| <b>How confident are you in your ability to change your parenting based on this feedback? (n=264)</b> |     |      |
| Very confident                                                                                        | 98  | 37.1 |
| Moderately confident                                                                                  | 124 | 47.0 |
| A little confident                                                                                    | 35  | 13.3 |
| Not at all confident                                                                                  | 7   | 2.7  |

*Note.* Percentages reflect the proportion of participants who answered these items. Reduced Ns are due to approximately 24% of participants declining to answer these items.
