# Supplementary material for: A Single-Session, Web-Based Parenting Intervention to Prevent Adolescent Depression and Anxiety Disorders: Randomized Controlled Trial
Source: PubMed Central journal article supplement (PMC5945988; doi:10.2196/jmir.9499), 2018-04-26
Supplement: jmir_v20i4e148_app6.pdf [file jmir_v20i4e148_app6.pdf]

## Multimedia Appendix 6. Observed scores for primary and secondary outcome measures at each measurement occasion

**Table 1.** Observed means, standard deviations, minimum and maximum for PRADAS at baseline, 1-month and 3-month follow-up

| Group               | Occasion     |                   |                   |
|---------------------|--------------|-------------------|-------------------|
|                     | Baseline     | 1-month follow-up | 3-month follow-up |
| <b>Intervention</b> |              |                   |                   |
| M (SD)              | 46.94 (7.86) | 51.18 (7.55)      | 51.83 (8.14)      |
| Minimum, maximum    | 22, 64       | 31, 67            | 23, 68            |
| <i>n</i>            | 164          | 153               | 151               |
| <b>Control</b>      |              |                   |                   |
| M (SD)              | 47.81 (6.68) | 49.35 (6.03)      | 49.81 (6.19)      |
| Minimum, maximum    | 28, 62       | 34, 65            | 26, 63            |
| <i>n</i>            | 185          | 176               | 177               |

**Table 2.** Observed means, standard deviations, minimum and maximum for all secondary outcome measures at baseline and 3-month follow-up.

| Measure          | Intervention  |               | Control       |               |
|------------------|---------------|---------------|---------------|---------------|
|                  | Baseline      | 3-month       | Baseline      | 3-month       |
| <b>PRADAS-A</b>  |               |               |               |               |
| M (SD)           | 24.55 (5.52)  | 23.95 (6.14)  | 24.46 (5.46)  | 23.93 (5.96)  |
| Minimum, maximum | 9, 34         | 8, 39         | 9, 37         | 7, 37         |
| <i>n</i>         | 154           | 146           | 173           | 159           |
| <b>SCAS-P</b>    |               |               |               |               |
| M (SD)           | 16.65 (10.82) | 13.30 (9.90)  | 16.86 (12.39) | 14.04 (11.57) |
| Minimum, maximum | 1, 64         | 0, 46         | 1, 97         | 0, 79         |
| <i>n</i>         | 164           | 151           | 185           | 177           |
| <b>SCAS-C</b>    |               |               |               |               |
| M (SD)           | 30.86 (19.08) | 29.85 (18.85) | 28.82 (16.73) | 26.58 (18.26) |
| Minimum, maximum | 3, 103        | 0, 99         | 4, 88         | 0, 99         |
| <i>n</i>         | 153           | 145           | 173           | 159           |
| <b>SMFQ-P</b>    |               |               |               |               |
| M (SD)           | 4.43 (4.73)   | 3.29 (4.22)   | 4.15 (4.45)   | 3.47 (3.97)   |
| Minimum, maximum | 0, 22         | 0, 24         | 0, 25         | 0, 16         |
| <i>n</i>         | 164           | 151           | 185           | 177           |
| <b>SMFQ-C</b>    |               |               |               |               |
| M (SD)           | 6.43 (5.63)   | 6.59 (6.10)   | 5.97 (5.70)   | 5.84 (6.09)   |
| Minimum, maximum | 0, 25         | 0, 25         | 0, 25         | 0, 26         |
| <i>n</i>         | 152           | 146           | 173           | 159           |

*Note.* PRADAS-A = Parenting to Reduce Adolescent Depression and Anxiety Scale – Adolescent-report; SCAS-P = Spence Children’s Anxiety Scale, Parent-report; SCAS-C = Spence Children’s Anxiety Scale, Child-report; SMFQ-P = Short Mood and Feelings Questionnaire, Parent-report; SMFQ-C = Short Mood and Feelings Questionnaire, Child-report.
